# Supplementary material for: Association Between Length of Only-Child Period During Early Childhood and Overweight at Age 8—A Population-Based Longitudinal Study in Japan
Source: Frontiers journal article supplement (doi:10.3389/fped.2022.782940), 2022-06-14
Supplement: Table_1.pdf [file Table_1.pdf]

Table A.1: Association of length of only child period and overweight at age 8 among boys whose mother was under the age of 35 at birth, using logistic regression (n=6,900)

Table A.1. Association of length of only child period and overweight at age 8 among boys whose mother was under the age of 35 at birth, using logistic regression (n=6,900)

|                                          |                                                     | Crude       |                     | Model 1 <sup>b</sup> |                     | Model 2 <sup>c</sup> |                     |
|------------------------------------------|-----------------------------------------------------|-------------|---------------------|----------------------|---------------------|----------------------|---------------------|
|                                          |                                                     | Odds Ratio  | 95% CI              | Odds Ratio           | 95% CI              | Odds Ratio           | 95% CI              |
| Length of only child period              | Only children (n=1,781)                             | Ref         | Ref                 | Ref                  | Ref                 | Ref                  | Ref                 |
|                                          | Age gap shorter than 1.5 years (n=350)              | 0.92        | (0.69, 1.22)        | 0.91                 | (0.68, 1.22)        | 0.88                 | (0.65, 1.19)        |
|                                          | Age gap 1.5 years to shorter than 4 years (n=3,950) | <b>0.76</b> | <b>(0.66, 0.87)</b> | <b>0.78</b>          | <b>(0.68, 0.91)</b> | <b>0.79</b>          | <b>(0.68, 0.92)</b> |
|                                          | Age gap 4 - 8 years (n=819)                         | <b>0.68</b> | <b>(0.55, 0.85)</b> | <b>0.71</b>          | <b>(0.56, 0.88)</b> | <b>0.72</b>          | <b>(0.57, 0.90)</b> |
| Household income at age 0.5 <sup>a</sup> |                                                     | -           | -                   | 0.98                 | (0.95, 1.01)        | 0.99                 | (0.95, 1.02)        |
| Birth weight <sup>a</sup>                |                                                     | -           | -                   | <b>1.06</b>          | <b>(1.04, 1.08)</b> | <b>1.12</b>          | <b>(1.10, 1.14)</b> |
| Mother's age at birth <sup>a</sup>       |                                                     | -           | -                   | 1.17                 | (0.97, 1.42)        | 1.20                 | (0.98, 1.46)        |
| Mother's education level                 | Junior high school                                  | -           | -                   | Ref                  | Ref                 | Ref                  | Ref                 |
|                                          | High school                                         | -           | -                   | 0.71                 | (0.50, 1.01)        | <b>0.68</b>          | <b>(0.48, 0.98)</b> |
|                                          | Vocational school                                   | -           | -                   | <b>0.70</b>          | <b>(0.49, 0.99)</b> | 0.71                 | (0.49, 1.02)        |
|                                          | Higher education                                    | -           | -                   | <b>0.58</b>          | <b>(0.39, 0.85)</b> | <b>0.59</b>          | <b>(0.39, 0.88)</b> |
|                                          | Others                                              | -           | -                   | 1.23                 | (0.31, 4.91)        | 2.03                 | (0.50, 8.28)        |
|                                          | Missing                                             | -           | -                   | 0.94                 | (0.54, 1.63)        | 0.90                 | (0.49, 1.62)        |
| Mother's smoking status at age 0.5       | No                                                  | -           | -                   | Ref                  | Ref                 | Ref                  | Ref                 |
|                                          | Yes                                                 | -           | -                   | <b>1.39</b>          | <b>(1.17, 1.66)</b> | <b>1.35</b>          | <b>(1.12, 1.62)</b> |

|                                                  |                  |   |   |      |              |             |                     |
|--------------------------------------------------|------------------|---|---|------|--------------|-------------|---------------------|
|                                                  | Missing          | - | - | 1.51 | (0.63, 3.63) | 1.43        | (0.57, 3.57)        |
| Father residence at age 0.5                      | Yes              | - | - | Ref  | Ref          | Ref         | Ref                 |
|                                                  | No               | - | - | 1.01 | (0.67, 1.54) | 0.92        | (0.61, 1.42)        |
| Preterm birth                                    | No               | - | - | -    | -            | Ref         | Ref                 |
|                                                  | Yes              | - | - | -    | -            | 1.25        | (0.88, 1.78)        |
| Duration of breastfeeding                        | None             | - | - | -    | -            | Ref         | Ref                 |
|                                                  | 1-2 months       | - | - | -    | -            | 0.94        | (0.70, 1.27)        |
|                                                  | 3-5months        | - | - | -    | -            | 0.83        | (0.61, 1.12)        |
|                                                  | 6 or more months | - | - | -    | -            | 1.00        | (0.76, 1.33)        |
|                                                  | Missing          | - | - | -    | -            | 1.13        | (0.62, 2.08)        |
| Rapid growth during early childhood <sup>d</sup> | No               | - | - | -    | -            | Ref         | Ref                 |
|                                                  | Yes              | - | - | -    | -            | <b>3.10</b> | <b>(2.68, 3.59)</b> |
|                                                  | Missing          | - | - | -    | -            | <b>1.74</b> | <b>(1.34, 2.24)</b> |
| Exercise habit at age 8                          | Yes              | - | - | -    | -            | Ref         | Ref                 |
|                                                  | No               | - | - | -    | -            | 1.13        | (0.99, 1.29)        |
| Breakfast consumption at age 8                   | Yes              | - | - | -    | -            | Ref         | Ref                 |
|                                                  | No               | - | - | -    | -            | 1.36        | (0.96, 1.91)        |
|                                                  | Missing          | - | - | -    | -            | 0.97        | (0.60, 1.59)        |
| Excessive screen time at age 8 <sup>e</sup>      | No               | - | - | -    | -            | Ref         | Ref                 |
|                                                  | Yes              | - | - | -    | -            | <b>1.28</b> | <b>(1.11, 1.48)</b> |
|                                                  | Missing          | - | - | -    | -            | 1.74        | (0.33, 9.32)        |
| Irregular sleeping hours at age 8                | No               | - | - | -    | -            | Ref         | Ref                 |
|                                                  | Yes              | - | - | -    | -            | 0.88        | (0.56, 1.37)        |

|                                             |         |   |   |   |   |             |                     |
|---------------------------------------------|---------|---|---|---|---|-------------|---------------------|
| Healthy dinner habits at age 8 <sup>f</sup> | Missing | - | - | - | - | 0.39        | (0.05, 3.17)        |
|                                             | Yes     | - | - | - | - | Ref         | Ref                 |
|                                             | No      | - | - | - | - | 1.05        | (0.91, 1.21)        |
|                                             | Missing | - | - | - | - | 1.00        | -                   |
| Grandparent cohabitation at age 8           | No      | - | - | - | - | Ref         | Ref                 |
|                                             | Yes     | - | - | - | - | <b>1.22</b> | <b>(1.06, 1.42)</b> |

CI; confidence interval

Bolded values indicate statistical significance at  $p < 0.05$ .

<sup>a</sup> Mother's age at birth, birth weight and household income at age 0.5 were scaled so that the effect of a one-unit change can be interpreted as the effect of a ten-year change in age, 100-gram change in weight, and one million JPY change in income, respectively.

<sup>b</sup> Model1 adjusted for household income at age 0.5, birth weight, mother's age at birth, mother's education level, mother's smoking at age 0.5 and father cohabitation at age 0.5.

<sup>c</sup> Model2 adjusted for preterm birth, duration of breastfeeding, rapid growth during early childhood, exercise habit at age 8, breakfast consumption at age 8, excessive screen time at age8, irregular bedtime at age 8, healthy dinner habits at age 8, and grandparent residence at age 8 in addition to covariates adjusted in Model 1.

<sup>d</sup> Rapid growth during infancy was determined as gaining more than 0.67SD of weight from age 0.5 years to age 1.5 years<sup>32</sup>.

<sup>e</sup> Excessive screen time was determined as two or more hours of watching TV or playing computer games on either weekdays or weekends at the age of 8 years old<sup>33</sup>.

<sup>f</sup> Unhealthy dinner habits were determined by frequent or occasional consumption of instant food and pre-cooked food, using food delivery, or eating out on weekdays, which was asked at the age of 8 years old.

Table A.2: Association of length of only child period and overweight at age 8 among girls whose mother was under the age of 35 at birth, using logistic regression (n=6,597)

Table A.2. Association of length of only child period and overweight at age 8 among girls whose mother was under the age of 35 at birth, using logistic regression (n=6,597)

|                                          |                                                     | Crude       |                     | Model 1 <sup>b</sup> |                     | Model 2 <sup>c</sup> |                     |
|------------------------------------------|-----------------------------------------------------|-------------|---------------------|----------------------|---------------------|----------------------|---------------------|
|                                          |                                                     | Odds Ratio  | 95% CI              | Odds Ratio           | 95% CI              | Odds Ratio           | 95% CI              |
| Length of only child period              | Only children (n=1,714)                             | Ref         | Ref                 | Ref                  | Ref                 | Ref                  | Ref                 |
|                                          | Age gap shorter than 1.5 years (n=310)              | 0.82        | (0.57, 1.17)        | 0.78                 | (0.54, 1.12)        | 0.80                 | (0.55, 1.16)        |
|                                          | Age gap 1.5 years to shorter than 4 years (n=3,793) | <b>0.68</b> | <b>(0.58, 0.81)</b> | <b>0.70</b>          | <b>(0.59, 0.84)</b> | <b>0.72</b>          | <b>(0.61, 0.86)</b> |
|                                          | Age gap 4 -8 years (n=780)                          | <b>0.75</b> | <b>(0.58, 0.97)</b> | 0.78                 | (0.60, 1.004)       | 0.79                 | (0.60, 1.03)        |
| Household income at age 0.5 <sup>a</sup> |                                                     | -           | -                   | <b>0.94</b>          | <b>(0.90, 0.98)</b> | <b>0.95</b>          | <b>(0.91, 0.99)</b> |
| Birth weight <sup>a</sup>                |                                                     | -           | -                   | <b>1.06</b>          | <b>(1.04, 1.08)</b> | <b>1.13</b>          | <b>(1.11, 1.16)</b> |
| Mother's age at birth <sup>a</sup>       |                                                     | -           | -                   | 1.08                 | (0.86, 1.36)        | 1.09                 | (0.86, 1.37)        |
| Mother's education level                 | Junior high school                                  | -           | -                   | Ref                  | Ref                 | Ref                  | Ref                 |
|                                          | High school                                         | -           | -                   | 0.82                 | (0.54, 1.24)        | 0.85                 | (0.55, 1.30)        |
|                                          | Vocational school                                   | -           | -                   | <b>0.63</b>          | <b>(0.41, 0.96)</b> | 0.68                 | (0.44, 1.05)        |
|                                          | Higher education                                    | -           | -                   | <b>0.50</b>          | <b>(0.32, 0.80)</b> | <b>0.54</b>          | <b>(0.33, 0.87)</b> |
|                                          | Others                                              | -           | -                   | 3.14                 | (0.54, 18.44)       | 3.10                 | (0.51, 18.84)       |
|                                          | Missing                                             | -           | -                   | 0.78                 | (0.40, 1.55)        | 0.72                 | (0.35, 1.51)        |
| Mother's smoking status at age 0.5       | No                                                  | -           | -                   | Ref                  | Ref                 | Ref                  | Ref                 |
|                                          | Yes                                                 | -           | -                   | 1.32                 | (1.08, 1.61)        | 1.28                 | (1.04, 1.58)        |

|                                                  |                  |   |   |      |              |             |                     |
|--------------------------------------------------|------------------|---|---|------|--------------|-------------|---------------------|
|                                                  | Missing          | - | - | 1.16 | (0.34, 3.95) | 0.91        | (0.26, 3.16)        |
| Father residence at age 0.5                      | Yes              | - | - | Ref  | Ref          | Ref         | Ref                 |
|                                                  | No               | - | - | 1.09 | (0.68, 1.73) | 0.97        | (0.60, 1.56)        |
| Preterm birth                                    | No               | - | - | -    | -            | Ref         | Ref                 |
|                                                  | Yes              | - | - | -    | -            | <b>1.86</b> | <b>(1.20, 2.87)</b> |
| Duration of breastfeeding                        | None             | - | - | -    | -            | Ref         | Ref                 |
|                                                  | 1-2 months       | - | - | -    | -            | 0.90        | (0.63, 1.28)        |
|                                                  | 3-5months        | - | - | -    | -            | 0.85        | (0.60, 1.21)        |
|                                                  | 6 or more months | - | - | -    | -            | 0.97        | (0.70, 1.35)        |
|                                                  | Missing          | - | - | -    | -            | 1.38        | (0.67, 2.84)        |
| Rapid growth during early childhood <sup>d</sup> | No               | - | - | -    | -            | Ref         | Ref                 |
|                                                  | Yes              | - | - | -    | -            | <b>3.02</b> | <b>(2.52, 3.61)</b> |
|                                                  | Missing          | - | - | -    | -            | <b>1.96</b> | <b>(1.45, 2.65)</b> |
| Exercise habit at age 8                          | Yes              | - | - | -    | -            | Ref         | Ref                 |
|                                                  | No               | - | - | -    | -            | 0.97        | (0.83, 1.13)        |
| Breakfast consumption at age 8                   | Yes              | - | - | -    | -            | Ref         | Ref                 |
|                                                  | No               | - | - | -    | -            | <b>2.16</b> | <b>(1.49, 3.13)</b> |
|                                                  | Missing          | - | - | -    | -            | 0.93        | (0.50, 1.76)        |
| Excessive screen time at age 8 <sup>e</sup>      | No               | - | - | -    | -            | Ref         | Ref                 |
|                                                  | Yes              | - | - | -    | -            | <b>1.36</b> | <b>(1.14, 1.62)</b> |
|                                                  | Missing          | - | - | -    | -            | 1.80        | (0.21, 15.2)        |
| Irregular sleeping hours at age 8                | No               | - | - | -    | -            | Ref         | Ref                 |
|                                                  | Yes              | - | - | -    | -            | 1.19        | (0.77, 1.85)        |

|                                             |         |   |   |   |   |             |                     |
|---------------------------------------------|---------|---|---|---|---|-------------|---------------------|
| Healthy dinner habits at age 8 <sup>f</sup> | Missing | - | - | - | - | 1.00        | -                   |
|                                             | Yes     | - | - | - | - | Ref         | Ref                 |
|                                             | No      | - | - | - | - | <b>1.21</b> | <b>(1.02, 1.43)</b> |
|                                             | Missing | - | - | - | - | <b>3.50</b> | <b>(1.25, 9.84)</b> |
| Grandparent cohabitation at age 8           | No      | - | - | - | - | Ref         | Ref                 |
|                                             | Yes     | - | - | - | - | <b>1.30</b> | <b>(1.09, 1.55)</b> |

CI; confidence interval

Bolded values indicate statistical significance at  $p < 0.05$ .

<sup>a</sup> Mother's age at birth, birth weight and household income at age 0.5 were scaled so that the effect of a one-unit change can be interpreted as the effect of a ten-year change in age, 100-gram change in weight, and one million JPY change in income, respectively.

<sup>b</sup> Model1 adjusted for household income at age 0.5, birth weight, mother's age at birth, mother's education level, mother's smoking at age 0.5 and father cohabitation at age 0.5.

<sup>c</sup> Model2 adjusted for preterm birth, duration of breastfeeding, rapid growth during early childhood, exercise habit at age 8, breakfast consumption at age 8, excessive screen time at age8, irregular bedtime at age 8, healthy dinner habits at age 8, and grandparent residence at age 8 in addition to covariates adjusted in Model 1.

<sup>d</sup> Rapid growth during infancy was determined as gaining more than 0.67SD of weight from age 0.5 years to age 1.5 years<sup>32</sup>.

<sup>e</sup> Excessive screen time was determined as two or more hours of watching TV or playing computer games on either weekdays or weekends at the age of 8 years old<sup>33</sup>.

<sup>f</sup> Unhealthy dinner habits were determined by frequent or occasional consumption of instant food and pre-cooked food, using food delivery, or eating out on weekdays, which was asked at the age of 8 years old.

Table A.3: Association of length of only child period and overweight at age 8 among boys, using logistic regression (n=6,779)

Table A.3. Association of length of only child period and overweight at age 8 among boys, using logistic regression (n=6,779)

|                                          |                                                     | Crude       |                     | Model 1 <sup>b</sup> |                     | Model 2 <sup>c</sup> |                     |
|------------------------------------------|-----------------------------------------------------|-------------|---------------------|----------------------|---------------------|----------------------|---------------------|
|                                          |                                                     | Odds Ratio  | 95% CI              | Odds Ratio           | 95% CI              | Odds Ratio           | 95% CI              |
| Length of only child period              | Only children (n=2,003)                             | Ref         | Ref                 | Ref                  | Ref                 | Ref                  | Ref                 |
|                                          | Age gap shorter than 1.5 years (n=312)              | 0.90        | (0.67, 1.21)        | 0.92                 | (0.68, 1.25)        | 0.87                 | (0.64, 1.20)        |
|                                          | Age gap 1.5 years to shorter than 4 years (n=3,707) | <b>0.74</b> | <b>(0.65, 0.85)</b> | <b>0.80</b>          | <b>(0.69, 0.93)</b> | <b>0.81</b>          | <b>(0.69, 0.94)</b> |
|                                          | Age gap 4 -8 years (n=757)                          | <b>0.66</b> | <b>(0.53, 0.83)</b> | <b>0.70</b>          | <b>(0.56, 0.88)</b> | <b>0.75</b>          | <b>(0.59, 0.95)</b> |
| Household income at age 0.5 <sup>a</sup> |                                                     | -           | -                   | 0.99                 | (0.97, 1.02)        | 0.99                 | (0.96, 1.02)        |
| Birth weight <sup>a</sup>                |                                                     | -           | -                   | <b>1.07</b>          | <b>(1.05, 1.08)</b> | <b>1.08</b>          | <b>(1.05, 1.11)</b> |
| Mother's age at birth <sup>a</sup>       |                                                     | -           | -                   | 1.16                 | (0.99, 1.36)        | 1.17                 | (0.99, 1.38)        |
| Mother's education level                 | Junior high school                                  | -           | -                   | Ref                  | Ref                 | Ref                  | Ref                 |
|                                          | High school                                         | -           | -                   | 0.82                 | (0.56, 1.20)        | 0.79                 | (0.53, 1.17)        |
|                                          | Vocational school                                   | -           | -                   | 0.77                 | (0.53, 1.13)        | 0.79                 | (0.53, 1.17)        |
|                                          | Higher education                                    | -           | -                   | 0.68                 | (0.45, 1.02)        | 0.68                 | (0.44, 1.04)        |
|                                          | Others                                              | -           | -                   | 1.42                 | (0.35, 5.72)        | 2.37                 | (0.56, 9.98)        |
|                                          | Missing                                             | -           | -                   | 0.62                 | (0.13, 3.02)        | 0.76                 | (0.15, 3.77)        |
| Mother's smoking at age 0.5              | No                                                  | -           | -                   | Ref                  | Ref                 | Ref                  | Ref                 |
|                                          | Yes                                                 | -           | -                   | <b>1.52</b>          | <b>(1.27, 1.82)</b> | <b>1.39</b>          | <b>(1.15, 1.69)</b> |
|                                          | Missing                                             | -           | -                   | 1.42                 | (0.56, 3.61)        | 1.32                 | (0.49, 3.57)        |
| Father residence at age 0.5              | Yes                                                 | -           | -                   | Ref                  | Ref                 | Ref                  | Ref                 |

|                                                  |                  |   |   |      |              |             |                     |
|--------------------------------------------------|------------------|---|---|------|--------------|-------------|---------------------|
|                                                  | No               | - | - | 1.32 | (0.88, 1.97) | 1.20        | (0.80, 1.82)        |
| BMI SD at birth                                  |                  | - | - | -    | -            | 1.50        | (1.32, 1.70)        |
| Change in BMI SD from birth to age 1.5           |                  | - | - | -    | -            | 1.42        | (1.31, 1.53)        |
| Preterm birth                                    | No               | - | - | -    | -            | Ref         | Ref                 |
|                                                  | Yes              | - | - | -    | -            | 1.06        | (0.74, 1.52)        |
| Duration of breastfeeding                        | None             | - | - | -    | -            | Ref         | Ref                 |
|                                                  | 1-2 months       | - | - | -    | -            | 0.91        | (0.67, 1.22)        |
|                                                  | 3-5months        | - | - | -    | -            | 0.80        | (0.59, 1.08)        |
|                                                  | 6 or more months | - | - | -    | -            | 0.92        | (0.69, 1.21)        |
|                                                  | Missing          | - | - | -    | -            | 0.81        | (0.41, 1.60)        |
| Rapid growth during early childhood <sup>d</sup> | No               | - | - | -    | -            | Ref         | Ref                 |
|                                                  | Yes              | - | - | -    | -            | <b>2.22</b> | <b>(1.88, 2.62)</b> |
|                                                  | Missing          | - | - | -    | -            | 1.00        | -                   |
| Exercise habit at age 8                          | Yes              | - | - | -    | -            | Ref         | Ref                 |
|                                                  | No               | - | - | -    | -            | 1.08        | (0.94, 1.24)        |
| Breakfast consumption at age 8                   | Yes              | - | - | -    | -            | Ref         | Ref                 |
|                                                  | No               | - | - | -    | -            | 1.27        | (0.89, 1.82)        |
|                                                  | Missing          | - | - | -    | -            | 0.87        | (0.51, 1.48)        |
| Excessive screen time at age 8 <sup>e</sup>      | No               | - | - | -    | -            | Ref         | Ref                 |
|                                                  | Yes              | - | - | -    | -            | <b>1.25</b> | <b>(1.08, 1.45)</b> |
|                                                  | Missing          | - | - | -    | -            | 1.02        | (0.20, 5.24)        |
| Irregular sleeping hours at age 8                | No               | - | - | -    | -            | Ref         | Ref                 |
|                                                  | Yes              | - | - | -    | -            | 0.98        | (0.64, 1.49)        |



|                                             |         |   |   |   |   |      |               |
|---------------------------------------------|---------|---|---|---|---|------|---------------|
| Healthy dinner habits at age 8 <sup>f</sup> | Missing | - | - | - | - | 0.96 | (0.19, 4.86)  |
|                                             | Yes     | - | - | - | - | Ref  | Ref           |
|                                             | No      | - | - | - | - | 1.08 | (0.94, 1.25)  |
|                                             | Missing | - | - | - | - | 1.00 | -             |
| Grandparent cohabitation at age 8           | No      | - | - | - | - | Ref  | Ref           |
|                                             | Yes     | - | - | - | - | 1.16 | (0.995, 1.34) |

CI; confidence interval

SD; standard deviation

Bolded values indicate statistical significance at  $p < 0.05$ .

<sup>a</sup> Mother's age at birth, birth weight and household income at age 0.5 were scaled so that the effect of a one-unit change can be interpreted as the effect of a ten-year change in age, 100-gram change in weight, and one million JPY change in income, respectively.

<sup>b</sup> Model1 adjusted for household income at age 0.5, birth weight, mother's age at birth, mother's education level, mother's smoking at age 0.5 and father cohabitation at age 0.5.

<sup>c</sup> Model2 adjusted for preterm birth, duration of breastfeeding, rapid growth during early childhood, exercise habit at age 8, breakfast consumption at age 8, excessive screen time at age8, irregular bedtime at age 8, healthy dinner habits at age 8, and grandparent residence at age 8 in addition to covariates adjusted in Model 1.

<sup>d</sup> Rapid growth during infancy was determined as gaining more than 0.67SD of weight from age 0.5 years to age 1.5 years<sup>32</sup>.

<sup>e</sup> Excessive screen time was determined as two or more hours of watching TV or playing computer games on either weekdays or weekends at the age of 8 years old<sup>33</sup>.

<sup>f</sup> Unhealthy dinner habits were determined by frequent or occasional consumption of instant food and pre-cooked food, using food delivery, or eating out on weekdays, which was asked at the age of 8 years old.

Table A.4: Association of length of only child period and overweight at age 8 among girls, using logistic regression (n=6,507)

Table A.4. Association of length of only child period and overweight at age 8 among girls, using logistic regression (n=6,507)

|                                          |                                                     | Crude       |                     | Model 1 <sup>b</sup> |                     | Model 2 <sup>c</sup> |                     |
|------------------------------------------|-----------------------------------------------------|-------------|---------------------|----------------------|---------------------|----------------------|---------------------|
|                                          |                                                     | Odds Ratio  | 95% CI              | Odds Ratio           | 95% CI              | Odds Ratio           | 95% CI              |
| Length of only child period              | Only children (n=1,893)                             | Ref         | Ref                 | Ref                  | Ref                 | Ref                  | Ref                 |
|                                          | Age gap shorter than 1.5 years (n=277)              | 0.89        | (0.62, 1.28)        | 0.85                 | (0.59, 1.24)        | 0.85                 | (0.58, 1.25)        |
|                                          | Age gap 1.5 years to shorter than 4 years (n=3,603) | <b>0.66</b> | <b>(0.56, 0.78)</b> | <b>0.69</b>          | <b>(0.58, 0.82)</b> | <b>0.67</b>          | <b>(0.56, 0.81)</b> |
|                                          | Age gap 4 -8 years (n=734)                          | <b>0.77</b> | <b>(0.60, 0.99)</b> | 0.80                 | (0.62, 1.04)        | 0.78                 | (0.59, 1.02)        |
| Household income at age 0.5 <sup>a</sup> |                                                     | -           | -                   | <b>0.95</b>          | <b>(0.91, 0.99)</b> | 0.96                 | (0.92, 1.00)        |
| Birth weight <sup>a</sup>                |                                                     | -           | -                   | <b>1.05</b>          | <b>(1.03, 1.07)</b> | <b>1.07</b>          | <b>(1.04, 1.11)</b> |
| Mother's age at birth <sup>a</sup>       |                                                     | -           | -                   | 1.18                 | (0.98, 1.43)        | 1.15                 | (0.94, 1.39)        |
| Mother's education level                 | Junior high school                                  | -           | -                   | Ref                  | Ref                 | Ref                  | Ref                 |
|                                          | High school                                         | -           | -                   | 0.82                 | (0.53, 1.27)        | 0.85                 | (0.53, 1.35)        |
|                                          | Vocational school                                   | -           | -                   | 0.66                 | (0.42, 1.02)        | 0.70                 | (0.44, 1.12)        |
|                                          | Higher education                                    | -           | -                   | 0.54                 | (0.33, 0.87)        | <b>0.55</b>          | <b>(0.33, 0.91)</b> |
|                                          | Others                                              | -           | -                   | 2.11                 | (0.38, 11.85)       | 2.59                 | (0.42, 15.88)       |
|                                          | Missing                                             | -           | -                   | 1.11                 | (0.12, 10.69)       | 1.37                 | (0.13, 14.25)       |
| Mother's smoking at age 0.5              | No                                                  | -           | -                   | Ref                  | Ref                 | Ref                  | Ref                 |
|                                          | Yes                                                 | -           | -                   | <b>1.29</b>          | <b>(1.05, 1.59)</b> | <b>1.28</b>          | <b>(1.02, 1.59)</b> |
|                                          | Missing                                             | -           | -                   | 0.83                 | (0.19, 3.61)        | 0.57                 | (0.13, 2.51)        |
| Father residence at age 0.5              | Yes                                                 | -           | -                   | Ref                  | Ref                 | Ref                  | Ref                 |

|                                                  |                  |   |   |      |              |             |                     |
|--------------------------------------------------|------------------|---|---|------|--------------|-------------|---------------------|
|                                                  | No               | - | - | 1.13 | (0.72, 1.77) | 0.93        | (0.58, 1.51)        |
| BMI SD at birth                                  |                  | - | - | -    | -            | <b>1.69</b> | <b>(1.46, 1.96)</b> |
| Change in BMI SD from birth to age 1.5           |                  | - | - | -    | -            | <b>1.62</b> | <b>(1.47, 1.79)</b> |
| Preterm birth                                    | No               | - | - | -    | -            | Ref         | Ref                 |
|                                                  | Yes              | - | - | -    | -            | <b>1.81</b> | <b>(1.19, 2.78)</b> |
| Duration of breastfeeding                        | None             | - | - | -    | -            | Ref         | Ref                 |
|                                                  | 1-2 months       | - | - | -    | -            | 0.87        | (0.61, 1.25)        |
|                                                  | 3-5months        | - | - | -    | -            | 0.87        | (0.61, 1.24)        |
|                                                  | 6 or more months | - | - | -    | -            | 1.03        | (0.74, 1.44)        |
|                                                  | Missing          | - | - | -    | -            | 1.80        | (0.89, 3.64)        |
| Rapid growth during early childhood <sup>d</sup> | No               | - | - | -    | -            | Ref         | Ref                 |
|                                                  | Yes              | - | - | -    | -            | <b>1.95</b> | <b>(1.59, 2.38)</b> |
|                                                  | Missing          | - | - | -    | -            | 1.00        | -                   |
| Exercise habit at age 8                          | Yes              | - | - | -    | -            | Ref         | Ref                 |
|                                                  | No               | - | - | -    | -            | 0.96        | (0.82, 1.12)        |
| Breakfast consumption at age 8                   | Yes              | - | - | -    | -            | Ref         | Ref                 |
|                                                  | No               | - | - | -    | -            | <b>2.03</b> | <b>(1.37, 3.02)</b> |
|                                                  | Missing          | - | - | -    | -            | 0.99        | (0.55, 1.79)        |
| Excessive screen time at age 8 <sup>e</sup>      | No               | - | - | -    | -            | Ref         | Ref                 |
|                                                  | Yes              | - | - | -    | -            | <b>1.31</b> | <b>(1.10, 1.56)</b> |
|                                                  | Missing          | - | - | -    | -            | 0.74        | (0.09, 6.27)        |
| Irregular sleeping hours at age 8                | No               | - | - | -    | -            | Ref         | Ref                 |
|                                                  | Yes              | - | - | -    | -            | 1.00        | (0.62, 1.63)        |

|                                             |         |   |   |   |   |             |                      |
|---------------------------------------------|---------|---|---|---|---|-------------|----------------------|
| Healthy dinner habits at age 8 <sup>f</sup> | Missing | - | - | - | - | 1.00        | -                    |
|                                             | Yes     | - | - | - | - | Ref         | Ref                  |
|                                             | No      | - | - | - | - | <b>1.21</b> | <b>(1.02, 1.43)</b>  |
|                                             | Missing | - | - | - | - | <b>3.70</b> | <b>(1.32, 10.35)</b> |
| Grandparent cohabitation at age 8           | No      | - | - | - | - | Ref         | Ref                  |
|                                             | Yes     | - | - | - | - | <b>1.42</b> | <b>(1.19, 1.69)</b>  |

CI; confidence interval

SD; standard deviation

Bolded values indicate statistical significance at  $p < 0.05$ .

<sup>a</sup> Mother's age at birth, birth weight and household income at age 0.5 were scaled so that the effect of a one-unit change can be interpreted as the effect of a ten-year change in age, 100-gram change in weight, and one million JPY change in income, respectively.

<sup>b</sup> Model1 adjusted for household income at age 0.5, birth weight, mother's age at birth, mother's education level, mother's smoking at age 0.5 and father cohabitation at age 0.5.

<sup>c</sup> Model2 adjusted for preterm birth, duration of breastfeeding, rapid growth during early childhood, exercise habit at age 8, breakfast consumption at age 8, excessive screen time at age8, irregular bedtime at age 8, healthy dinner habits at age 8, and grandparent residence at age 8 in addition to covariates adjusted in Model 1.

<sup>d</sup> Rapid growth during infancy was determined as gaining more than 0.67SD of weight from age 0.5 years to age 1.5 years<sup>32</sup>.

<sup>e</sup> Excessive screen time was determined as two or more hours of watching TV or playing computer games on either weekdays or weekends at the age of 8 years old<sup>33</sup>.

<sup>f</sup> Unhealthy dinner habits were determined by frequent or occasional consumption of instant food and pre-cooked food, using food delivery, or eating out on weekdays, which was asked at the age of 8 years old.
